# Supplementary material for: Enzyme-free detection of creatinine as a kidney dysfunction biomarker using TiO2 flow-through membranes
Source: Royal Society of Chemistry journal article supplement (doi:10.1039/d4na00562g), 2024-12-02
Supplement: d4na00562g1.pdf [file d4na00562g1.pdf]

## **Enzyme free detection of creatinine as a kidney dysfunction biomarker using TiO<sub>2</sub> flow through membrane**

**Nilem Khaliq<sup>1,3,5</sup>, Ghafar Ali<sup>2\*</sup>, Muhammad Asim Rasheed<sup>1\*</sup>, Maaz Khan<sup>2</sup>, Wazir Muhammad<sup>4</sup>, Patrik Schmuki<sup>3</sup>, Shafqat Karim<sup>2</sup>**

<sup>1</sup>Department of Physics and Applied Mathematics, Pakistan Institute of Engineering and Applied Sciences (PIEAS), Islamabad 45650, Pakistan

<sup>2</sup>Nanomaterials Research Group (NRG), Physics Division, PINSTECH, Islamabad 44000, Pakistan

<sup>3</sup>Department of Materials Science and Engineering, University of Erlangen-Nuremberg, Martensstrasse 7, D-91058 Erlangen, Germany

<sup>4</sup>Department of Physics (Medical Physics – CAMPEP accredited), Charles E. Schmidt College of Science, Florida Atlantic University (FAU), Boca Raton, FL 33431, USA

<sup>5</sup>Department of Physics, Women University Swabi, Swabi, Khyber Pakhtunkhwa. Pakistan

\* E-mail: [ghafarali@kaist.ac.kr](mailto:ghafarali@kaist.ac.kr),

[masimr22@gmail.com](mailto:masimr22@gmail.com)

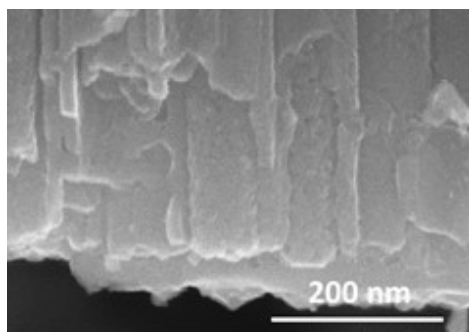

**Figure S1:** FESEM image showing cross-sectional views of TNTs near bottom side.

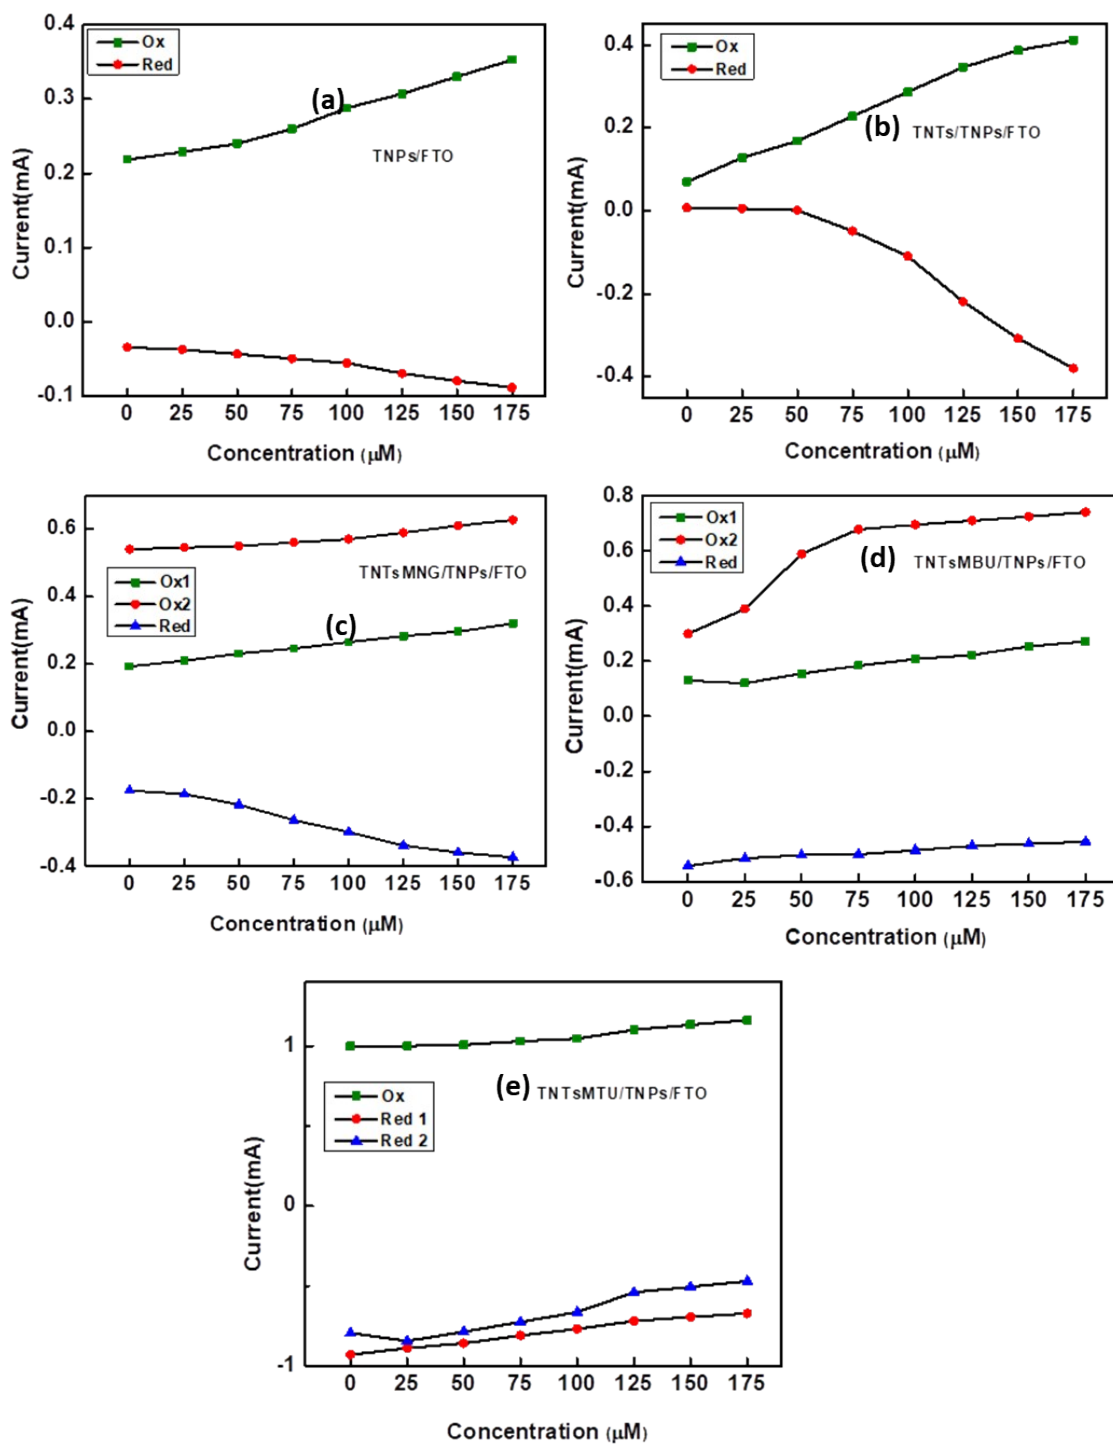

**Figure S2:** Linear response plot for varying creatinine concentration vs. redox peaks for (a) TNPs/FTO, (b) TNTs/TNPs/FTO, (c) TNTsMNG/TNPs/FTO, (d) TNTsMBU/TNPs/FTO, and (e) TNTsMTU/TNPs/FTO.

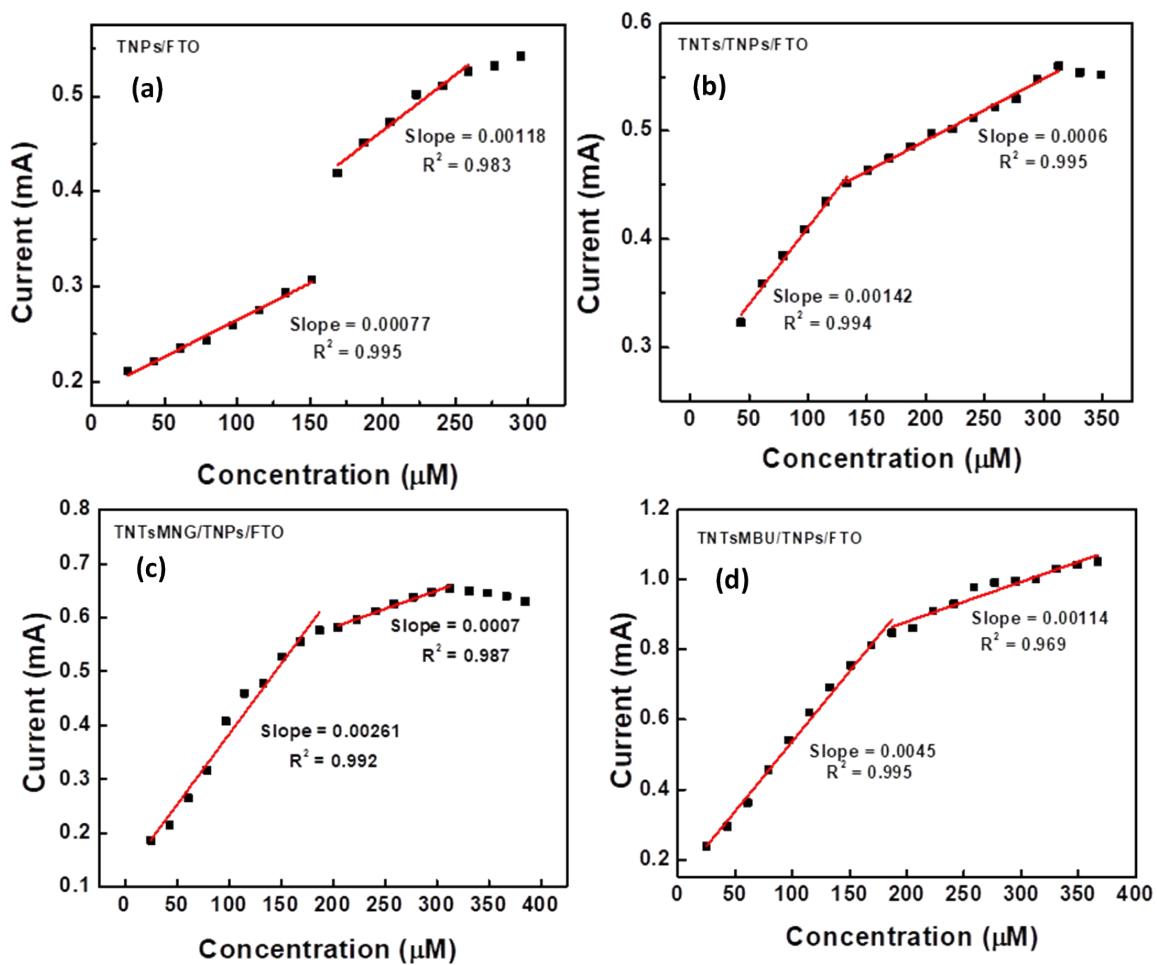

**Figure S3:** Linear Fitting of calibration curves of (a) TNPs/FTO, (b) TNTs/TNPs/FTO, (c) TNTsMNG/TNPs/FTO, and (d) TNTsMBU/TNPs/FTO.

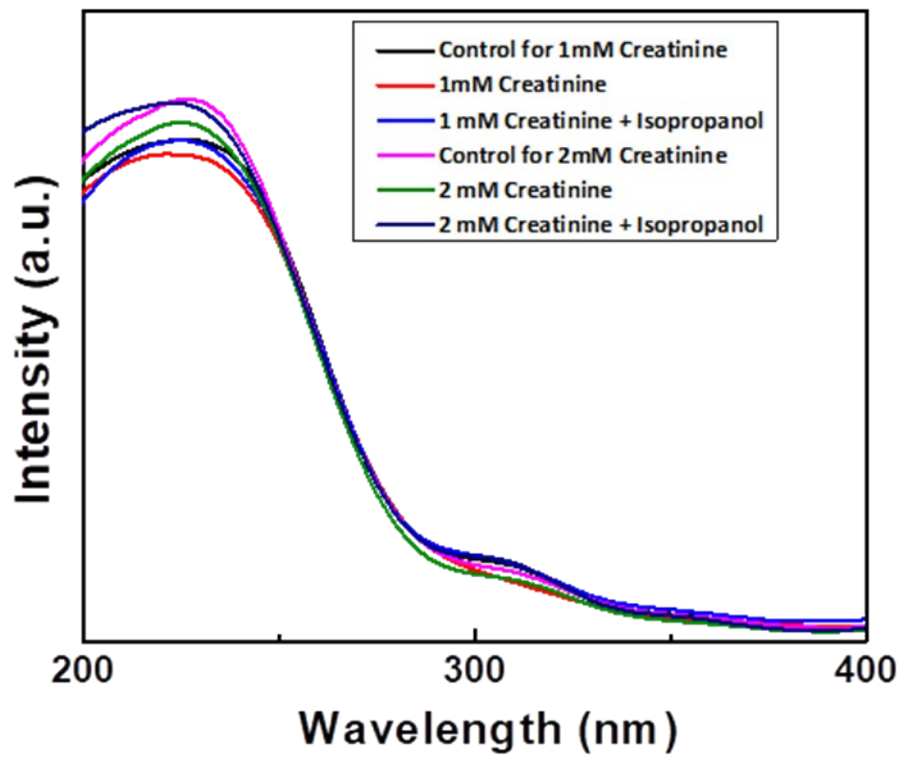

**Figure S4:** UV-Visible spectra of creatinine in the presence and absence of isopropanol.
